# Supplementary material for: Fluorescence biosensor for the H5N1 antibody based on a metal–organic framework platform
Source: Royal Society of Chemistry journal article supplement (doi:10.1039/c3tb00501a), 2013-01-01
Supplement: c3tb00501a.pdf [file c3tb00501a.pdf]

## Supporting Information

**Table S1** Fluorescence intensity changes to different kinds of MOF

| MOF<br>Fluorescence        | CuSO <sub>4</sub><br>5H <sub>2</sub> O | H <sub>2</sub> dtoa<br>-H <sub>2</sub> | H <sub>2</sub> dtoa<br>-Cu | H <sub>2</sub> dtoa<br>-Mn | H <sub>2</sub> dtoa<br>-Co | H <sub>2</sub> dtoa<br>-Ni | Fe<br>-DBC | Cr<br>-DBC | Mn<br>-DBC |
|----------------------------|----------------------------------------|----------------------------------------|----------------------------|----------------------------|----------------------------|----------------------------|------------|------------|------------|
| Io:(FAM-DNA)               | 850                                    | 862                                    | 875                        | 870                        | 854                        | 865                        | 856        | 840        | 868        |
| Iq:(FAM-DNA<br>+MOF)       | 50                                     | 788                                    | 565                        | 720                        | 709                        | 524                        | 767        | 900        | 785        |
| Ir:(FAM-DNA<br>+MOF+Exo I) | 48                                     | 766                                    | 801                        | 773                        | 752                        | 746                        | 802        | 837        | 813        |
| Io-Iq                      | 800                                    | 74                                     | 310                        | 150                        | 145                        | 341                        | 89         | -60        | 83         |
| Ir-Iq                      | -2                                     | -22                                    | 236                        | 53                         | 43                         | 222                        | 35         | -63        | 28         |
| Iq/Io                      | 94.12%                                 | 8.85%                                  | 35.43%                     | 17.24%                     | 16.98%                     | 39.42%                     | 10.40%     | -7.14%     | 9.56%      |

**Table S2** Recovery of H<sub>5</sub>N<sub>1</sub> antibody in 1% human serum

| Sample | H <sub>5</sub> N <sub>1</sub> antibody<br>add (nM) | Found (nM) | Recovery (%) |
|--------|----------------------------------------------------|------------|--------------|
| 1      | 0                                                  | —          | —            |
| 2      | 5                                                  | 4.7        | 94           |
| 3      | 10                                                 | 10.2       | 102          |
| 4      | 100                                                | 98.3       | 98.3         |
